1 Reconciling high-throughput gene essentiality data with metabolic network  
2 reconstructions

3  
4 Anna S. Blazier<sup>1</sup>, Jason A. Papin<sup>1,2,3\*</sup>

5 <sup>1</sup>Biomedical Engineering

6 <sup>2</sup>Medicine, Infectious Diseases & International Health

7 <sup>3</sup>Biochemistry & Molecular Genetics

8 University of Virginia; Charlottesville, Virginia, 22908; USA

9 \*Correspondence: papin@virginia.edu

10

11 **Abstract**

12

13 The identification of genes essential for bacterial growth and survival represents a  
14 promising strategy for the discovery of antimicrobial targets. Essential genes can be  
15 identified on a genome-scale using transposon mutagenesis approaches; however,  
16 variability between screens and challenges with interpretation of essentiality data hinder  
17 the identification of both condition-independent and condition-dependent essential genes.  
18 To illustrate the scope of these challenges, we perform a large-scale comparison of multiple  
19 published *Pseudomonas aeruginosa* gene essentiality datasets, revealing substantial  
20 differences between the screens. We then contextualize essentiality using genome-scale  
21 metabolic network reconstructions and demonstrate the utility of this approach in  
22 providing functional explanations for essentiality and reconciling differences between  
23 screens. Genome-scale metabolic network reconstructions also enable a high-throughput,  
24 quantitative analysis to assess the impact of media conditions on the identification of  
25 condition-independent essential genes. Our computational model-driven analysis provides  
26 mechanistic insight into essentiality and contributes novel insights for design of future  
27 gene essentiality screens and the identification of core metabolic processes.

28

29 **Author Summary**

30

31 With the rise of antibiotic resistance, there is a growing need to discover new  
32 therapeutic targets to treat bacterial infections. One attractive strategy is to target genes  
33 that are essential for growth and survival. Essential genes can be identified with  
34 transposon mutagenesis approaches; however, variability between screens and challenges  
35 with interpretation of essentiality data hinder the identification and analysis of essential  
36 genes. We performed a large-scale comparison of multiple gene essentiality screens of the  
37 microbial pathogen *Pseudomonas aeruginosa*. We implemented a computational model-  
38 driven approach to provide functional explanations for essentiality and reconcile  
39 differences between screens. The integration of computational modeling with high-  
40 throughput experimental screens may enable the identification of drug targets with high-  
41 confidence and provide greater understanding for the development of novel therapeutic  
42 strategies.

43

## 44 Introduction

45

46 With the rise of antibiotic resistance, there is a growing need to discover new  
47 therapeutic targets to treat bacterial infections. One attractive strategy is to target genes  
48 that are essential for growth and survival [1–4]. Discovery of such genes has been a long-  
49 standing interest, and advances in transposon mutagenesis combined with high-  
50 throughput sequencing have enabled their identification on a genome-scale. Transposon  
51 mutagenesis screens have been used to discriminate between *in vivo* and *in vitro* essential  
52 genes [1,5], discover genes uniquely required at different infection sites [6], and assess the  
53 impact of co-infection on gene essentiality status [7]. However, nuanced differences in  
54 experimental methods and data analysis can lead to variable essentiality calls between  
55 screens and hamper the identification of essential genes with high-confidence [8,9].  
56 Additionally, a central challenge of these screens is in interpreting why a gene is or is not  
57 essential in a given condition, hindering the identification of promising drug targets.

58 These data are often used to validate and curate genome-scale metabolic network  
59 reconstructions (GENREs) [10,11]. GENREs are knowledgebases that capture the genotype-  
60 to-phenotype relationship by accounting for all the known metabolic genes and associated  
61 reactions within an organism of interest. These reconstructions can be converted into  
62 mathematical models and subsequently used to probe the metabolic capabilities of an  
63 organism or cell type in a wide range of conditions. GENREs of human pathogens have been  
64 used to discover novel drug targets [12], determine metabolic constraints on the  
65 development of antibiotic resistance [13], and identify metabolic determinants of virulence  
66 [14]. Importantly, GENREs can be used to assess gene essentiality by simulating gene  
67 knockouts. Through *in silico* gene essentiality analysis, GENREs can be useful in the  
68 systematic comparison of gene essentiality datasets.

69 Here, we perform the first large-scale, comprehensive comparison and  
70 reconciliation of multiple gene essentiality screens and contextualize these datasets using  
71 genome-scale metabolic network reconstructions. We apply this framework to the Gram-  
72 negative, multi-drug resistant pathogen *Pseudomonas aeruginosa*, using several published  
73 transposon mutagenesis screens performed in various media conditions and the recently  
74 published GENREs for strains PAO1 and PA14. We demonstrate the utility of interpreting  
75 transposon mutagenesis screens with GENREs by providing functional explanations for  
76 essentiality, resolving differences between the screens, and highlighting gaps in our  
77 knowledge of *P. aeruginosa* metabolism. Finally, we perform a high-throughput,  
78 quantitative analysis to assess the impact of media conditions on identification of core  
79 essential genes. This work demonstrates how genome-scale metabolic network  
80 reconstructions can help interpret gene essentiality data and guide future experiments to  
81 further enable the identification of essential genes with high-confidence.

82

## 83 Results

84

85 *Comparison of candidate essential genes reveals variability across transposon mutagenesis*  
86 *screens*

87

88 We obtained data from several published transposon mutagenesis screens for *P.*  
89 *aeruginosa* strains PAO1 and PA14 in various media conditions and determined candidate

90 essential genes for each screen as described in Methods (Table S1) [15–19]. Briefly, where  
91 available, we used the published essential gene lists identified by the authors of the screen.  
92 Otherwise, we defined genes as essential in a particular screen if the corresponding mutant  
93 did not appear in that screen, suggesting that a mutation in the corresponding gene  
94 resulted in a non-viable mutant. Candidate essential gene lists ranged in size from 179 to  
95 913 for PA01 and from 510 to 1544 for PA14, suggesting substantial variability between  
96 the screens (Table 1, Dataset\_S1, Dataset\_S2). To investigate the similarity between the  
97 different candidate essential gene lists for the two strains, we performed hierarchical  
98 clustering with complete linkage on the dissimilarity between the candidate essential gene  
99 lists, as measured by Jaccard distance (Figure 1A and 1C). Interestingly, the screens  
100 clustered by publication rather than by media condition for both strains. As an example  
101 from the PA01 screens, rather than clustering by lysogeny broth (LB) media, sputum  
102 media, pyruvate minimal media, and succinate minimal media, all three of the screens from  
103 the Lee et al. publication clustered together, all three of the screens analyzed in the Turner  
104 et al. publication clustered together, and the Jacobs et al. transposon mutant library  
105 clustered independently. This result suggests that experimental technique and  
106 downstream data analysis play a large role in determining essential gene calls, motivating  
107 the importance of comparing several screens to identify consensus essential gene lists, or  
108 genes identified as essential across multiple screens.

109 We then measured the overlap of the candidate essential gene lists to calculate how  
110 many genes were shared across all the screens as well as those unique to particular sets of  
111 screens, defined as intersections (Figure 1B and 1D). For both strains, the candidate  
112 essential genes unique to the transposon mutant libraries (i.e., PA01.LB.913 and  
113 PA14.LB.1544) accounted for the largest grouping, reflecting the disproportionately large  
114 size of both screens' candidate essential gene lists relative to the transposon sequencing  
115 screens. Approximately 63% and 54% of the essential genes were unique to the  
116 PA14.LB.1544 and PA01.LB.913 screens, respectively. While genes were uniquely essential  
117 for PA01 on individual LB screens, there were no genes uniquely essential to all three LB  
118 screens; rather, the genes identified as commonly essential in all three LB screens were  
119 also identified in one or more of the sputum, pyruvate and succinate screens. This trend  
120 also held for the PA01 sputum screens; however, 61 genes were uniquely identified in the  
121 succinate minimal media screen and two genes were uniquely identified in the pyruvate  
122 minimal media screen, perhaps reflecting the more stringent conditions of the minimal  
123 media screens relative to the more rich conditions of the LB and sputum screens.

124 This analysis revealed substantial differences in the overlap of the candidate  
125 essential genes across the screens. Using the number of intersections as an indicator of  
126 variability, comparison of the PA01 screens resulted in more than 30 intersections, while  
127 comparison of the PA14 screens resulted in seven, highlighting the discrepancies between  
128 the screens for both *P. aeruginosa* strains. This heterogeneity across the screens could be  
129 attributed to a number of factors such as screening approach (e.g., individually mapped  
130 mutants versus transposon sequencing), library complexity, metrics of essentiality, data  
131 analysis, and the media conditions tested. To investigate the possibility that these  
132 discrepancies were completely due to data analysis alone and not experimental differences,  
133 we re-analyzed the sequencing data for the PA01 transposon sequencing screens  
134 performed on LB where sequencing data was publicly available using the same analytical  
135 pipeline (Figure S1)[18,20]. As expected, when the same analysis pipeline was applied to

136 the two screens, there was an increase in the number of commonly essential genes  
137 compared to the overlap between the published results. However, there were still genes  
138 that were identified as uniquely essential to each screen. These results suggest that  
139 differences in data processing alone do not account for the observed variability between  
140 the screens but that experimental differences, such as library complexity, number of  
141 replicates, and read depth, likely also contribute.

142 To determine potential core essential genes (i.e., genes that are essential regardless  
143 of media or other conditions), we measured the number of genes that were shared by all of  
144 the screens for either PA01 or PA14. Surprisingly, only 17 genes were shared by all PA01  
145 screens while 192 genes were shared by all PA14 screens. These numbers of core essential  
146 genes are lower than expected, particularly for strain PA01. Typically, essential genes are  
147 thought to number a few hundred for the average bacterial genome [21]. We reasoned that  
148 this unexpectedly low number of observed core essential genes might be due to the variety  
149 of media conditions across the PA01 screens, so we repeated our analysis focusing only on  
150 the LB media screens for both PA14 and PA01 (Figure S2). Interestingly, the trends  
151 remained the same, with 434 genes shared across both PA14 LB media screens and only 44  
152 genes shared across all PA01 LB media screens. Overall, the PA14 screens had higher  
153 numbers of essential genes compared to those for PA01, with all the PA14 screens having  
154 at least 400 essential genes. In contrast, there were four PA01 screens with less than 350  
155 essential genes. Together, these differences suggest greater variability for transposon  
156 mutagenesis in PA01 compared to PA14. Strain-specific differences in essentiality have  
157 been reported previously but are underappreciated [22]. This result adds to the growing  
158 literature emphasizing how the genetic background of the strain analyzed may impact the  
159 identification of essential genes. Nevertheless, the identified core essential genes point to  
160 genes that may potentially be indispensable for bacterial growth and survival regardless of  
161 condition.

162 Taken together, results from this comparison revealed vast differences between the  
163 candidate essential gene lists across screens, even for those from the same media  
164 condition. These differences may be due to a number of factors such as experimental  
165 screening approach, library complexity, read depth, and downstream data analysis.  
166 Ultimately, this variability complicates the discovery of essential genes with high-  
167 confidence.

### 168 *Contextualization of gene essentiality datasets using genome-scale metabolic network* 169 *reconstructions*

170  
171  
172 A central challenge of transposon mutagenesis screens lies in the interpretation of  
173 why a gene is or is not essential in a given condition. Here, we demonstrate the utility of  
174 genome-scale metabolic network reconstructions to contextualize gene essentiality and  
175 provide mechanistic explanations for the essentiality status of metabolic genes. To do this,  
176 we compared the *in vitro* candidate essential gene lists to predicted essential genes from  
177 the PA01 and PA14 GENREs [23]. These GENREs were previously shown to predict gene  
178 essentiality with an accuracy of 91% [23]. For both models, we simulated *in silico* gene  
179 knockouts under media conditions that approximated those used in the *in vitro* screens and  
180 assessed the resulting impact on biomass synthesis as an approximation for growth  
181 (Dataset\_S3, Dataset\_S4). Genes were predicted to be essential if biomass production for

182 the associated mutant model was below a standard threshold. Predicted essential gene lists  
183 for both the PAO1 and PA14 models under the different media conditions were compared  
184 to the candidate essential gene lists for each of the experimental screens and the matching  
185 accuracy between model predictions and the *in vitro* screens was assessed (Figure 2A,  
186 Table S2).

187 As expected, most genes were identified as nonessential by both the screens and the  
188 models. These nonessential genes likely encode redundant features in the metabolic  
189 network, such as isozymes or alternative pathways, or are involved in accessory  
190 metabolism, such as the production of small molecule virulence factors. Interestingly, the  
191 number of screen-essential genes predicted as nonessential was significantly larger than  
192 the number of screen-nonessential genes predicted as essential ( $p < 0.01$ , as measured by  
193 Wilcoxon signed-rank test). We hypothesize that the reason for this difference is due to the  
194 increased likelihood of an *in vitro* screen missing a gene, potentially due to gene length or  
195 transposition cold spots [16], and subsequently incorrectly identifying it as essential.

196 This analysis can help to provide specific functional explanations for essentiality.  
197 Where there is agreement between the model predictions and *in vitro* screens, we can use  
198 the network to explain why a gene is or is not essential. Similarly, we can analyze the  
199 network to explain why a gene may be essential in one media condition versus another. A  
200 mismatch denotes some discrepancy between the model predictions and the experimental  
201 results. These mismatches may point to a gap in the model, indicating that it is missing  
202 some relevant biological information. Alternatively, the mismatches may be due to  
203 experimental variability such as differences in environmental conditions or technique.

204 To begin contextualizing the gene essentiality datasets using the GENREs, we  
205 focused on metabolic genes that were identified as essential or as nonessential in all LB  
206 screens for either PAO1 or PA14 (which we termed “consensus essential genes” and  
207 “consensus nonessential genes”, respectively) (Table S3, Dataset\_S5, Dataset\_S6).  
208 Consensus essential genes have a greater likelihood of being truly essential rather than  
209 experimental artifacts since they were identified as such in multiple independent screens.  
210 We then compared these lists of consensus essential genes and consensus nonessential  
211 genes to the model predictions of essentiality in LB media.

212 From this comparison, we found 45 of 113 consensus essential genes predicted to  
213 be essential by the PA14 model and 777 of 800 consensus nonessential genes predicted to  
214 be nonessential by the PA14 model. For PAO1, we found seven of 15 consensus essential  
215 genes predicted to be essential by the PAO1 model and 843 of 863 consensus nonessential  
216 genes predicted as nonessential by the PAO1 model (Table S3). The low number of  
217 consensus essential genes for PAO1 reflects the high variability between screens, as  
218 highlighted in Figures 1 and S1.

219 We then used the models to delineate subsystem assignments for the model-  
220 predicted consensus essential and nonessential genes (Figure 2B for PA14 and Figure S3  
221 for PAO1). As expected, the consensus nonessential genes spanned most subsystems within  
222 the network, likely due to redundancy in the network as well as the presence of accessory  
223 metabolic functions that are not critical for biomass production. In contrast, for PA14, the  
224 consensus essential genes were limited to seven of the 14 subsystems within the network  
225 (note that this trend does not hold for PAO1 because there were very few consensus  
226 essential genes to consider). These seven subsystems capture metabolic pathways that are  
227 critical for bacterial growth and survival. For instance, lipid metabolism is essential for

228 building and maintaining cell membranes, while carbohydrate metabolism is critical for  
229 ATP generation. None of the genes involved in transport were consensus essential genes.  
230 Because we only considered screens performed in LB media, transport of individual  
231 important metabolites, such as a specific carbon sources, was not a limiting factor given the  
232 abundant availability of such compounds in rich media conditions. However, we would  
233 expect that if we considered screens performed under minimal media conditions, relevant  
234 transport genes would be essential for bacterial growth.

235 Because these consensus essential genes were also predicted to be essential by the  
236 model, we can use the network to provide functional reasons for essentiality. For example,  
237 both the model and screens identified the gene *adk*, encoding adenylate kinase, as essential.  
238 Using the model, we determined that when *adk* is not functional, the conversion of  
239 deoxyadenosine diphosphate (dADP) to deoxyadenosine monophosphate (dAMP) cannot  
240 proceed, impacting the cell's ability to synthesize DNA and ultimately produce biomass  
241 (Figure 2C). The model can also tease out less obvious relationships. For instance, both the  
242 model and the screens identified *glmS*, encoding glucosamine-fructose-6-phosphate  
243 aminotransferase, as essential. Using the model, we found that when *glmS* is not functional,  
244 the conversion of L-Glutamine to D-Glucosamine phosphate cannot proceed. D-  
245 Glucosamine phosphate is an essential precursor to both Lipid A, a component of the  
246 endotoxin lipopolysaccharide, and peptidoglycan, which forms the cell wall (Figure 2D).  
247 For each of the model-predicted consensus essential genes, we identified which biomass  
248 components could not be synthesized when the gene was removed from the model  
249 (Dataset\_S7 and Dataset\_S8). Further analysis is necessary to tease out the metabolic  
250 pathways that prevent synthesis of these biomass metabolites; however, from the  
251 examples above it is evident that GENREs can provide both obvious and non-obvious  
252 functional explanations for essentiality, streamlining the interpretation of transposon  
253 mutagenesis screens.

254 In addition to identifying consensus essential and nonessential genes that were in  
255 agreement with the models, we also uncovered discrepancies between model predictions  
256 and experimental results. For PA01 and PA14, respectively, there were 8 and 68 consensus  
257 essential genes that the models predicted to be nonessential and 20 and 23 consensus  
258 nonessential genes that the models predicted to be essential. These mismatches between  
259 model predictions and experimental results provide insight into gaps in our understanding  
260 of *P. aeruginosa* metabolism.

261 In the case where a consensus essential gene was predicted to be non-essential by  
262 the model, this result indicates that the model has some additional functionality that is not  
263 available *in vitro*. This result could be an inaccuracy of the network reconstruction or it  
264 could be a result of using a non-condition-specific network where the model has access to  
265 all possible reactions in the network. Because cells undergo varying states of regulation,  
266 gene essentiality can be modulated as a result. Thus, profiling data such as transcriptomics  
267 could be integrated into the network reconstruction to generate a condition-specific model  
268 to improve model predictions under specified conditions [24,25].

269 In contrast, in the case where a consensus nonessential gene was predicted to be  
270 essential, this result indicates that the model is missing key functionality, pointing to areas  
271 of potential model curation. Using this list of discrepancies to guide curation (Table 2), we  
272 performed an extensive literature review and found several suggested changes to the  
273 metabolic network reconstruction (Dataset\_S9). For instance, we incorrectly predicted as

274 essential the gene *fabI* (PA1806), which is linked to triclosan resistance; however, a recent  
275 study discovered an isozyme of *fabI* in PAO1 called *fabV* (PA2950) [26]. To account for this  
276 new information, we suggest changing the gene-protein-reaction (GPR) relationship for the  
277 28 reactions governed by *fabI* to be “*fabI* OR *fabV*”, making *fabI* no longer essential in the  
278 model. Additionally, our model incorrectly predicted the genes *ygiH* (PA0581) and *plsX*  
279 (PA2969) to be essential due to a GPR formulation of “*ygiH* AND *plsX*” for several reactions  
280 in glycerolipid metabolism. Literature evidence suggests that the gene-product of *plsB*  
281 (PA3673) is also able to catalyze these reactions. Specifically, the gene-products of both  
282 *plsB* and the *ygiH/plsX* system are able to carry out the acylation of glycerol-3-phosphate  
283 from an acyl carrier protein whereas only the gene-product of *plsB* is able to carry out this  
284 reaction for acyl-CoA thioesters [27,28]. This experimental evidence motivates changing  
285 the GPRs for 16 reactions in glycerolipid metabolism.

286 In addition to changes in the GPR formulation for specific reactions, we also  
287 identified a potential change to the biomass reaction. Two PAO1 genes, *glgA* (PA2165) and  
288 *algC* (PA5322), are incorrectly predicted as essential for the synthesis of glycogen, a  
289 biomass component. Glycogen is not an essential metabolite for *P. aeruginosa* growth;  
290 however, it is very important for energy storage, which is why it was initially included in  
291 the biomass reaction [29]. Removal of glycogen from the biomass equation would make  
292 *glgA* and *algC* accurate predictions as nonessential genes in PAO1. Implementing these  
293 proposed changes in the PAO1 and PA14 GENREs resulted in enhanced predictive  
294 capability of the models (Dataset\_S10, Dataset\_S11, Table S3). The updated PAO1 model  
295 predicted consensus gene essentiality status in LB media with an accuracy of 97.4%  
296 compared to 96.8% for the original model. Meanwhile, the updated PA14 model predicted  
297 consensus gene essentiality status in LB media with an accuracy of 90.5% compared to  
298 90.0% for the original mode. It is worth noting that, although these changes to the  
299 reconstructions were made to address essentiality discrepancies in LB media conditions,  
300 they also improved the PAO1 model predictive capabilities for consensus genes in sputum  
301 media, increasing accuracy from 92.6% to 93.0%.

302 While we identified several changes to the model to improve predictions, there were  
303 several genes for which we could find no literature evidence to change their predicted  
304 essentiality status. These genes highlight gaps in our current knowledge and  
305 understanding of *Pseudomonas* metabolism and indicate areas of future research.  
306 Identification of these knowledge gaps is not possible without the reconciliation of  
307 experimental data with model predictions. Ultimately, this analysis demonstrates the utility  
308 of integrating data with GENREs to improve gene annotation and suggest areas of future  
309 research.

310 In addition to contextualizing essentiality for a given media condition, we also used  
311 the model to explain why certain metabolic genes are essential in one media-type versus  
312 another. We compared consensus LB essential genes to consensus sputum essential genes  
313 for PAO1 and identified the essential genes that were either shared by both conditions or  
314 unique to one condition versus the other. Overall, 18 genes were commonly essential, while  
315 92 genes were uniquely essential in sputum and 26 genes were uniquely essential in LB,  
316 indicating the presence of condition-dependent essential genes.

317 We then focused our analysis just on those genes that were also present in the PAO1  
318 model and compared these lists to model predictions. We found four genes that both the  
319 model and the screens indicated as uniquely essential in sputum but not in LB.

320 Interestingly, all four of these genes (*pyrB*, *pyrC*, *pyrD*, and *pyrF*) are involved in pyrimidine  
321 metabolism. Applying flux sampling [30] to the PAO1 metabolic network model, we  
322 investigated why these four genes were uniquely essential in sputum but not in LB (Figure  
323 2E). The pyrimidine metabolic pathway directly leads to the synthesis of several key  
324 biomass precursors (UMP, CMP, dCMP and dTMP), making it an essential subsystem within  
325 the network. Under LB media conditions, there are two inputs into the pathway, one  
326 through L-Glutamine and the other through Cytosine. However, in sputum media  
327 conditions, L-Glutamine is the only input into the pathway. Because of this reduction in the  
328 number of available substrates in sputum media, the steps for L-Glutamine breakdown  
329 must be active to synthesize the biomass precursors. Thus, the genes responsible for  
330 catalyzing this breakdown are essential in sputum media conditions. In contrast, because  
331 there are two LB substrates that feed into pyrimidine metabolism, if a gene involved in the  
332 breakdown of one of the substrates is not functional the other substrate is still accessible,  
333 thus making the deletion of that gene nonessential.

334 As stated above, further constraining the model with profiling data from both media  
335 conditions would help to further contextualize differences in the essentiality results by  
336 modulating the availability of certain reactions. Nevertheless, as demonstrated here, the  
337 metabolic network reconstruction can be a useful tool for providing functional  
338 explanations for why certain genes are essential in one condition versus another.

339  
340 *Quantitative evaluation of the impact of media formulation on condition-independent*  
341 *essential gene identification*

342  
343 Given the variability in the number of candidate essential genes across the screens,  
344 we were interested in using the models to quantitatively evaluate the impact of media  
345 conditions on essentiality. We first focused our analysis on how the number of considered  
346 minimal media conditions impacts the number of condition-independent essential genes  
347 identified, or the number of genes found as essential in every condition. To do this, we  
348 simulated growth of the PA14 model on 42 different minimal media and performed *in silico*  
349 gene knockouts, identifying the genes essential for biomass production on each media  
350 condition (Figure 3A). We then randomly selected groups of minimal media conditions and  
351 compared their essential gene lists to determine the commonly essential genes, defined as  
352 the overlap. We performed this random selection of minimal media conditions for group  
353 sizes ranging from two to 40 minimal media conditions considered. For each group size, we  
354 randomly selected minimal media conditions 500 times. As expected, the more media  
355 conditions considered, the smaller the overlap of essential genes (Figure 3B). This  
356 relationship between the number of media conditions considered and the size of the  
357 overlap is best characterized by an exponential decay, with the size of the overlap  
358 eventually converging on 131 genes as 40 conditions are considered. This result suggests  
359 that to identify a core set of condition-independent essential genes, dozens of minimal  
360 media screens need to be compared. However, variability between the screens, as indicated  
361 by the error bars, could still confound interpretation, necessitating the comparison of  
362 replicates and potentially even more screens to truly identify condition-independent  
363 essential genes with high confidence.

364 We next assessed how modifications to a rich media, like LB, impact gene  
365 essentiality. LB is a complex media with known batch-to-batch variability [31,32],



366 motivating this analysis of how differences in LB composition can alter essentiality. Given  
367 the challenge of modeling concentration, here the simulations focus on the presence or  
368 absence of metabolites in LB media. Specifically, we randomly selected carbon source  
369 components from LB media in sets of varying sizes, ranging from two to 21 LB media  
370 components considered. We then used these sets as the model media conditions and  
371 performed *in silico* gene knockouts to identify essential genes for biomass production on  
372 each LB media formulation (Figure 4A). For each set size, we randomly selected LB  
373 components 100 times and calculated the average number of essential genes identified as  
374 well as the number of shared essential genes across all 100 sets. As the number of LB media  
375 components increases, we found that the size of the essential gene lists decreases linearly  
376 (Figure 4B). If we were to consider even more media components beyond the scope of LB,  
377 we predict that this linear relationship would eventually plateau due to limitations in the  
378 metabolic network. This result suggests that a media richer than LB may be necessary to  
379 identify a core set of condition-independent essential genes.

380 Interestingly, we found that as more complex LB media formulations are  
381 considered, the number of shared essential genes across 100 simulations quickly converges  
382 on 111. Indeed, only three LB media components were needed to achieve this overlap.  
383 Thus, even though the average size of essential gene lists is larger for less complex media  
384 formulations, the overlap of these larger essential gene lists still results in the same overlap  
385 as more complex media formulations, suggesting that changes in complex media  
386 formulation have minimal impact on determining a core set of essential genes.

387 However, for this analysis, we had compared 100 random media formulations for  
388 each set size, potentially masking the impact of media changes on essentiality. To identify  
389 how many LB media formulations need to be compared to converge on this overlap value,  
390 we re-ran this analysis 10 times and, for each iteration, determined the number of samples,  
391 or replicates, needed to recapture the 111 overlapping genes (Figure 4C). In more complex  
392 media formulations, relatively few comparisons are needed to identify the 111 overlapping  
393 essential genes. However, as fewer LB media components are considered, more  
394 comparisons need to be made. For example, in the case of formulations consisting of only  
395 three LB media components, nearly 60 comparisons are needed to converge on the 111  
396 overlap essential genes. Thus, as the media formulation diverges from true LB due to batch-  
397 to-batch variability, more comparisons are necessary to converge on a core set of essential  
398 genes.

399 Taken together, these computational analyses define the scope that is needed to  
400 identify condition-independent essential genes. These results suggest that both the number  
401 of media conditions and the number of replicates analyzed can impact our ability to  
402 determine condition-independent essential genes.

## 403 404 **Discussion**

405  
406 The identification of both condition-dependent and condition-independent essential  
407 genes has been a long-standing interest [33,34]. Determination of these essential processes  
408 can aid in the discovery of novel antibacterial targets as well as the discovery of minimal  
409 genomes required to sustain life [7,35]. In this study, we performed a large-scale  
410 comparison of multiple gene essentiality datasets and contextualized essential genes using  
411 genome-scale metabolic network reconstructions. We applied this approach to several *P.*

412 *aeruginosa* transposon mutagenesis screens performed on multiple media conditions and  
413 demonstrated the utility of GENREs in providing functional explanations for essentiality  
414 and resolving differences between screens. Finally, using the *P. aeruginosa* GENRE, we  
415 performed a high-throughput, quantitative analysis to determine how media conditions  
416 impact the identification of condition-independent essential genes. The resulting insights  
417 would be challenging to develop without the use of a computational model of *P. aeruginosa*  
418 metabolism. Our work enables the elucidation of mechanistic explanations for essentiality,  
419 which is challenging to determine experimentally. Ultimately, this approach serves as a  
420 framework for future contextualization of gene essentiality data and can be applied to any  
421 cell type for which such data is available. Additionally, by quantifying the impact of media  
422 conditions on the identification of condition-independent essential genes, we contribute  
423 novel insights for design of future gene essentiality screens and identification of core  
424 metabolic processes.

425 Recent advances in deep-sequencing technologies combined with transposon  
426 mutagenesis have enabled high-throughput determination of candidate essential genes for  
427 a variety of bacterial species in a wide range of environmental conditions [36]. While  
428 researchers have demonstrated reasonable reproducibility within a given study [37],  
429 variability across studies has been suggested but not assessed on a large-scale [1,38]. Our  
430 comparison of multiple *P. aeruginosa* transposon mutagenesis screens revealed substantial  
431 variability in candidate essential genes within and across media conditions, particularly for  
432 strain PA01. Numerous factors may contribute to this lack of overlap between the screens,  
433 such as differences in transposon insertion library complexity, differences in data analysis  
434 and statistical determination of essentiality, as well as environmental variability between  
435 the screens [8,9]. Factors such as these lead to discrepancies between screens and  
436 complicate our ability to identify high-confidence sets of condition-dependent and  
437 condition-independent essential genes.

438 Focusing on one of these factors, we used the metabolic model of *P. aeruginosa*  
439 strain PA14 to quantitatively assess how media formulation impacts the identification of  
440 condition-independent essential genes. While previous *in vitro* studies have surveyed  
441 conditional essentiality in numerous environmental conditions, these screens used an  
442 already established mutant library for each media-type [39]. In this work, we  
443 computationally generated *de novo* mutant libraries for individual media conditions,  
444 eliminating any bias from starting with an established mutant library. Ultimately, we found  
445 that to determine a high-confidence set of core essential genes for minimal media  
446 conditions, more than 40 minimal media formulations need to be compared. We extended  
447 this analysis to consider how differences in rich media formulations impact gene  
448 essentiality and found that as rich media formulations diverge, as many as 60 replicates are  
449 needed to identify condition-independent essential genes with high-confidence. Taken  
450 together, these computational results suggest a rich opportunity for a large-scale  
451 experimental effort to identify with high confidence condition-independent essential genes.  
452 These insights would be impossible to garner without computational modeling due to the  
453 sheer number of comparisons made.

454 In addition to variability between datasets, a central difficulty of performing gene  
455 essentiality screens lies in the interpretation of why a gene is essential in a given condition.  
456 Oftentimes, laborious follow-up experiments are necessary to investigate the role of a gene  
457 in a given condition using lower-throughput approaches [36]. Here, we presented a

458 strategy for contextualizing gene essentiality data using genome-scale metabolic network  
459 reconstructions. We demonstrated the utility of this approach by providing functional  
460 reasons for essentiality for consensus LB media essential genes. For these genes, we  
461 determined which specific components of biomass could not be synthesized when the gene  
462 was knocked out. Additionally, by analyzing the network structure and flux patterns, we  
463 used the model to explain why certain genes are essential in one condition versus another.  
464 Our computational approach provides testable hypotheses regarding the functional role of  
465 a gene in synthesizing biomass in a given environmental condition, streamlining  
466 downstream follow-up experiments. In future work, profiling data could be integrated with  
467 the metabolic networks to further enhance the utility of these models in contextualizing  
468 gene essentiality [24]. Additionally, integration of transcriptional regulatory networks with  
469 the GENREs would further expand the number of genes considered [40].

470 In summary, genome-scale metabolic network reconstructions can guide the design  
471 of gene essentiality screens and help to interpret their results. The identification of both  
472 condition-independent and condition-dependent essential genes is vital for the discovery  
473 of novel therapeutic strategies and mechanistic modeling streamlines the ability to identify  
474 these genes. This framework can be applied to numerous other organisms of both clinical  
475 and industrial relevance.

476

## 477 **Acknowledgments**

478

479 The authors would like to thank Jennifer Bartell and Joanna Goldberg for early discussions  
480 related to the project, Laura Dunphy, Kevin Janes, and Phillip Yen for thoughtful comments  
481 on the manuscript, and Sean Leonard for assistance in analysis of the transposon  
482 sequencing raw datasets. Support for this project was provided by The Wagner Fellowship  
483 and Unilever.

484

## 485 **Author Contributions**

486

487 A.S.B. and J.A.P. conceived and designed the study. A.S.B. completed all analyses. A.S.B. and  
488 J.A.P. wrote and edited the manuscript.

489

## 490 **Declaration of Interests**

491

492 The authors declare no conflict of interest.

493

## 494 **Methods**

495

### 496 *Data sources*

497

498 Transposon insertion library datasets were downloaded from the original publication for  
499 each screen where available. Screens were renamed following this pattern:  
500 *Strain.Media.NumEssentials*, where *Strain* indicated whether the screen was for strain PAO1  
501 or PA14, *Media* indicated which media condition the screen was performed on, and  
502 *NumEssentials* indicated the number of essential genes identified for the given strain on the  
503 given media condition. Specifically, for the PAO1.LB.201, PAO1.Sputum.224, and

504 PAO1.Pyruvate.179 datasets, Dataset\_S01 was downloaded from [19]. For the  
505 PAO1.LB.335, PAO1.Sputum.405, and PAO1.Succinate.640 datasets, Dataset\_S01 was  
506 downloaded from [18]. For the PA14.LB.634 dataset, Table S1 was downloaded from [17].  
507 For the PA14.Sputum.510 dataset, Dataset\_S04 was downloaded from [18]. For the  
508 PAO1.LB.913 dataset, PA\_two\_allele\_library5.xlsx was downloaded from the Manoil  
509 Laboratory website (<http://www.gs.washington.edu/labs/manoil/libraryindex.htm>). For  
510 the PA14.LB.1544 dataset, NRSetFile\_v5\_061004.xls was downloaded from the PA14  
511 Transposon Insertion Mutant Library website ([http://pa14.mgh.harvard.edu/cgi-](http://pa14.mgh.harvard.edu/cgi-bin/pa14/downloads.cgi)  
512 [bin/pa14/downloads.cgi](http://pa14.mgh.harvard.edu/cgi-bin/pa14/downloads.cgi)).

513  
514 The PAO1 and PA14 genome-scale metabolic network reconstructions were downloaded  
515 from the Papin Laboratory website ([http://www.bme.virginia.edu/csbl/Downloads1-](http://www.bme.virginia.edu/csbl/Downloads1-pseudomonas.html)  
516 [pseudomonas.html](http://www.bme.virginia.edu/csbl/Downloads1-pseudomonas.html)).

517  
518 *Generation of candidate essential gene lists*

519  
520 Candidate essential genes were determined for each screen as follows. For PAO1.LB.201,  
521 we considered genes to be essential if they were not disrupted in all six of the Tn-seq runs  
522 on LB in the original dataset. For PAO1.Sputum.224, we considered genes to be essential if  
523 they were not disrupted in all four of the Tn-seq runs on sputum in the original dataset. For  
524 PAO1.Pyruvate.179, we considered genes to be essential if they were not disrupted in all  
525 three of the Tn-seq screens on Pyruvate minimal media in the original dataset. For  
526 PAO1.LB.335, PAO1.Sputum.405, and PAO1.Succinate.640, we used the genes that were  
527 labeled as essential in the original dataset. For PAO1.LB.913, the mutants listed in the  
528 transposon insertion library were compared to a list of all known genes in the PAO1  
529 genome. Genes in the PAO1 genome that were not in the mutant library list were  
530 considered to be essential. For PA14.LB.634, we used the genes listed as essential in the  
531 original dataset. For PA14.BHI.424 and PA14.Sputum.510, we used the genes that were  
532 labeled as essential in the original dataset. For PA14.LB.1544, the mutants listed in the  
533 transposon insertion library were compared to a list of all known genes in the PA14  
534 genome. Genes in the PA14 genome that were not in the mutant library list were  
535 considered to be essential.

536  
537 *Comparison of candidate essential gene lists*

538  
539 Hierarchical clustering with complete linkage was performed on the candidate essential  
540 gene lists for the PA14 and PAO1 screens and visualized with a dendrogram. The overlap  
541 between the datasets was visualized using the R-package, UpsetR [41].

542  
543 *Re-analysis of transposon sequencing datasets*

544 PAO1.LB.335 sequencing data were downloaded from NCBI SRA under the accession  
545 number SRX031647. PAO1.LB.201 sequencing data were downloaded from NCBI SRA  
546 under the accession number PRJNA273663. Data were analyzed using methods adapted  
547 from [18,20]. Briefly, reads were mapped to the PAO1 reference genome  
548 (GCA\_000006765.1 ASM676v1 assembly downloaded from NCBI) using bowtie2 v.2.3.4.1.  
549 Open reading frame assignments were modified where 10% of the 3' end of every gene was

550 removed in order to disregard insertions that may not interrupt gene function. Aligned  
551 reads were mapped to genes and we removed the 50 most abundant sites to account for  
552 potential PCR amplification bias. We applied weighted LOESS smoothing to correct for  
553 genome position-dependent effects. One-hundred random datasets were generated by  
554 randomizing insertion locations. Previous analysis showed that results begin to converge  
555 after 50 random datasets [18]. We compared the random datasets to the experimental  
556 datasets with a negative binomial test in DESeq2. We corrected for multiple testing by  
557 adjusting the p-value with the Benjamini-Hochberg method. We used the mclust package in  
558 R to test whether a gene was ‘reduced’ or ‘unchanged’. Genes were called ‘essential’ if they  
559 were assigned to the ‘reduced’ category by mclust with an adjusted p-value <0.05 and  
560 uncertainty <0.1.

561

### 562 *Model gene essentiality predictions*

563

564 *In silico* gene essentiality screens were performed in relevant media conditions using the  
565 PAO1 and PA14 genome-scale metabolic network reconstructions [23]. Specifically, media  
566 formulations were computationally approximated for LB, sputum, pyruvate minimal media,  
567 and succinate minimal media for the PAO1 simulations and LB and sputum for the PA14  
568 simulations. Systematically, genes were deleted from the models one-by-one and the  
569 resulting impact on biomass production was assessed. If biomass production for the  
570 associated mutant model was below  $0.0001 \text{ h}^{-1}$ , a standard threshold, the knocked-out gene  
571 was predicted to be essential [23]. For each *in silico* predicted essential gene, we  
572 determined which biomass components specifically could not be synthesized using the  
573 COBRA toolbox function, biomassPrecursorCheck() [42]. Statistical significance for the  
574 comparison of the “mismatch: model nonessential, screen essential” category and the  
575 “mismatch: model essential, screen nonessential” category was assessed using the  
576 Wilcoxon signed-rank test.

577

### 578 *Subsystem assignment of consensus essential and nonessential genes*

579

580 For each of the consensus essential and nonessential genes that were also present in the  
581 PAO1 and PA14 models, we determined which subsystems they participated in using an in-  
582 house script (see Supplementary Information). Briefly, we first converted model  
583 subsystems to broad subsystems based on KEGG functional categories [43]. We then  
584 identified the reactions associated with the gene of interest and used the broad subsystem  
585 of this reaction to indicate the subsystem assignment for the gene of interest. Where there  
586 was more than one reaction connected to a gene, we used the reaction associated with the  
587 first instance of the gene in the network for subsystem assignment.

588

### 589 *Flux sampling in LB and sputum*

590

591 The impact of media conditions on flux through pyrimidine metabolism in the PAO1  
592 metabolic network reconstruction was assessed using the flux sampling algorithm  
593 optGpSampler [30]. Briefly, optGpSampler samples the solution space of genome-scale  
594 metabolic networks using the Artificial Centering Hit-and-Run algorithm and returns a  
595 distribution of possible flux values for reactions of interest. Three-thousand flux samples

596 were collected for each simulation, using one thread and a step-size of one. Maximization of  
597 biomass synthesis was set as the objective function. Flux sampling simulations were  
598 performed for PAO1 grown in LB media and sputum media. The median flux values for  
599 every reaction in pyrimidine metabolism were compared between the LB and sputum  
600 simulations to determine whether flux was higher, lower, or unchanged in sputum versus  
601 LB.

602

### 603 *Media formulation impact on essentiality*

604

605 The impact of media formulation on gene essentiality predictions was assessed using the  
606 PA14 genome-scale metabolic network reconstruction. For the minimal media analysis, the  
607 PA14 model was grown on 42 different minimal media and *in silico* essential genes were  
608 identified as described above. We then randomly selected groups of minimal media  
609 conditions of varying sizes, ranging from two to 41 minimal media conditions considered,  
610 and found the intersection of the group's predicted essential gene lists, or the genes that  
611 were identified as essential in every condition considered within that group. For each  
612 group size, we randomly selected minimal media conditions 500 times.

613

614 For the LB media analysis, we randomly selected components from LB media in sets of  
615 varying sizes, ranging from two to 21 LB media components considered, used these sets as  
616 the model media conditions, and identified *in silico* essential genes as above. For each set  
617 size, we randomly selected LB components 100 times and calculated the average total  
618 number of essential genes identified and the intersection of the essential genes across all  
619 100 sets. To determine how many LB media formulations needed to be compared to  
620 converge on this intersection, we re-ran this LB media formulation analysis 10 times and,  
621 for each iteration, determined the number of samples needed to achieve the size of the  
622 overlap if all 100 samples were considered at each set size

623

### 624 *Code and data availability*

625

626 Code and files necessary to recreate figures and data can be found here:  
627 <https://github.com/ablazier/gene-essentiality>

628

### 629 *Computational resources*

630

631 The COBRA Toolbox 2.0.5 [42], the Gurobi 6.5 solver, and MATLAB R2016a were used for  
632 model simulations. optGPSampler1.1 was used for flux sampling simulations [30]. Bowtie2  
633 v.2.3.4.1 [44] and Samtools v.1.3.1 [45] were used for transposon sequencing analysis. R  
634 3.3.3 was used for all other analyses and figure generation.

635

636

637

638 **Figures and Legends**

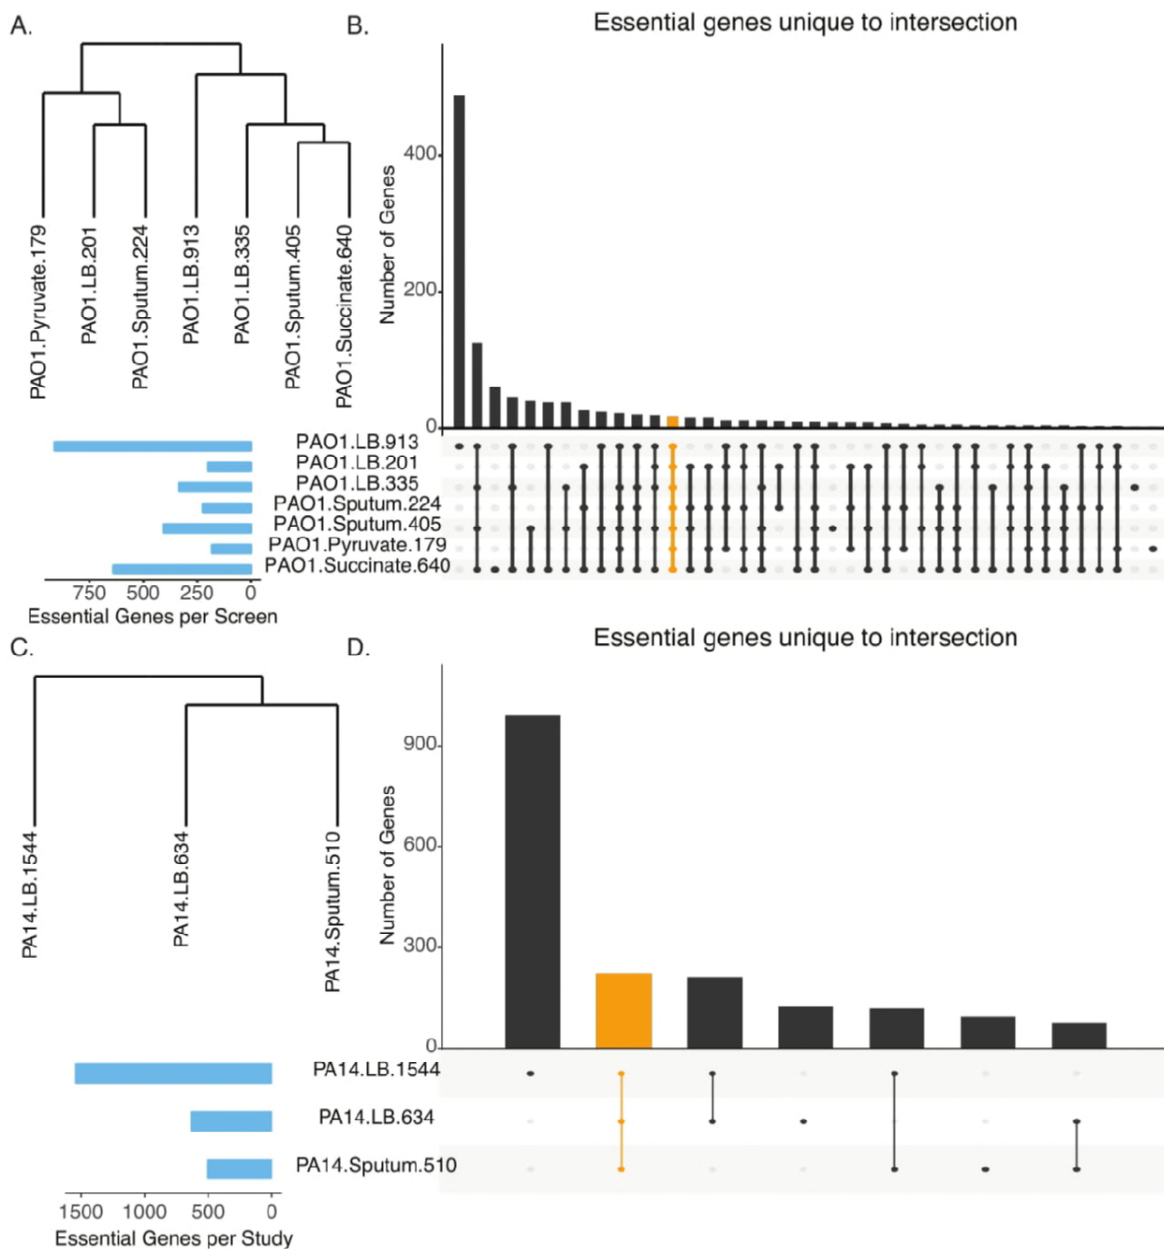

639  
 640 **Figure 1. Comparison of candidate essential genes from transposon mutagenesis**  
 641 **screens reveals variability.**  
 642 (A and C). Hierarchical clustering of candidate essential gene lists from transposon  
 643 mutagenesis screens for PAO1 and PA14, respectively.  
 644 (B and D). Overlap analysis of candidate essential gene lists for transposon mutagenesis  
 645 screens for PAO1 and PA14, respectively. Blue bars indicate the total number of candidate  
 646 essential genes identified in each screen. Black bars indicate the number of candidate  
 647 essential genes unique to the intersection given by the filled-in dots. The orange bar  
 648 indicates the overlap for all screens for either PAO1 (Panel B) or PA14 (Panel D). For the  
 649 relationship between the overlap analysis and venn diagrams, see Figures S1 and S2.

650

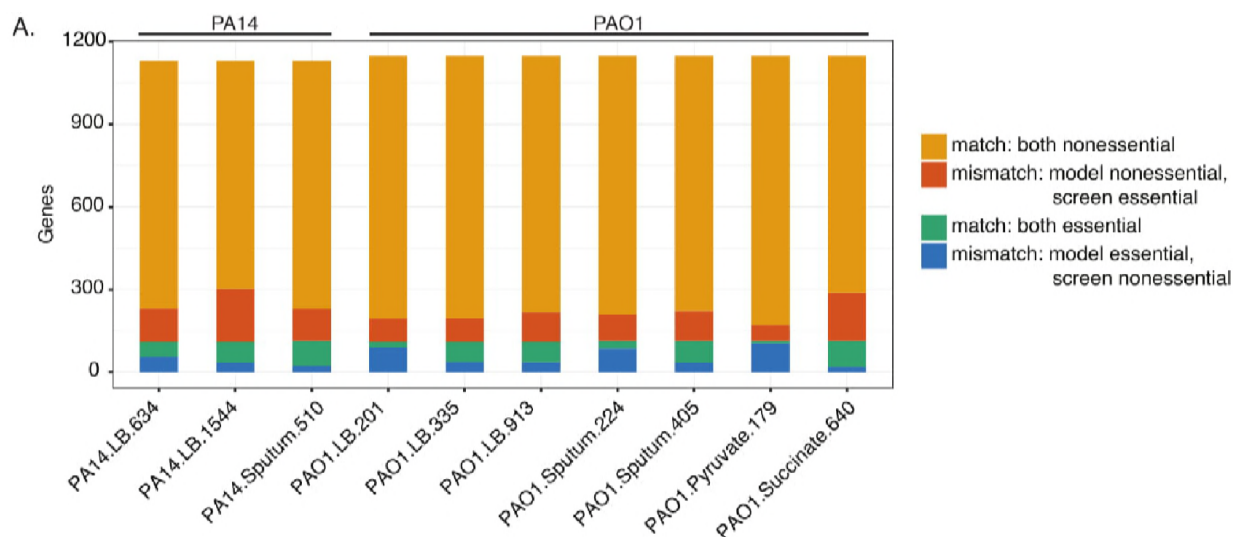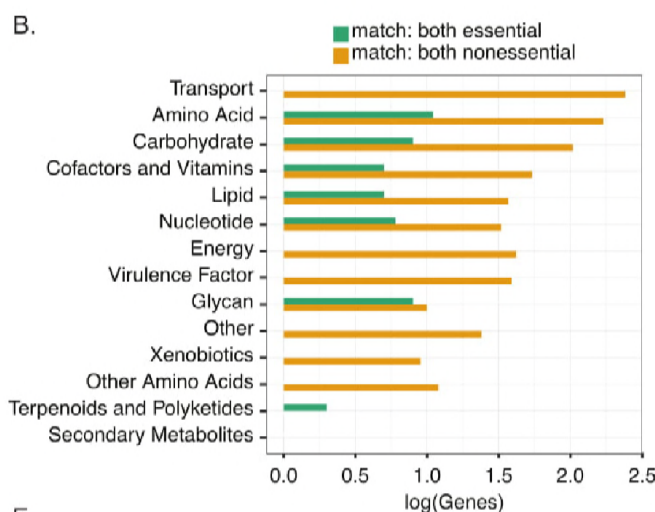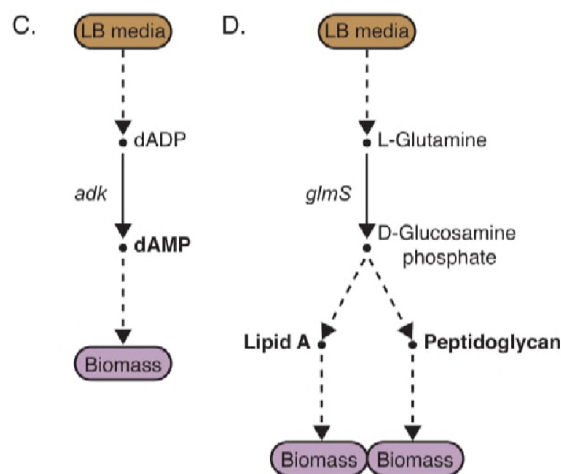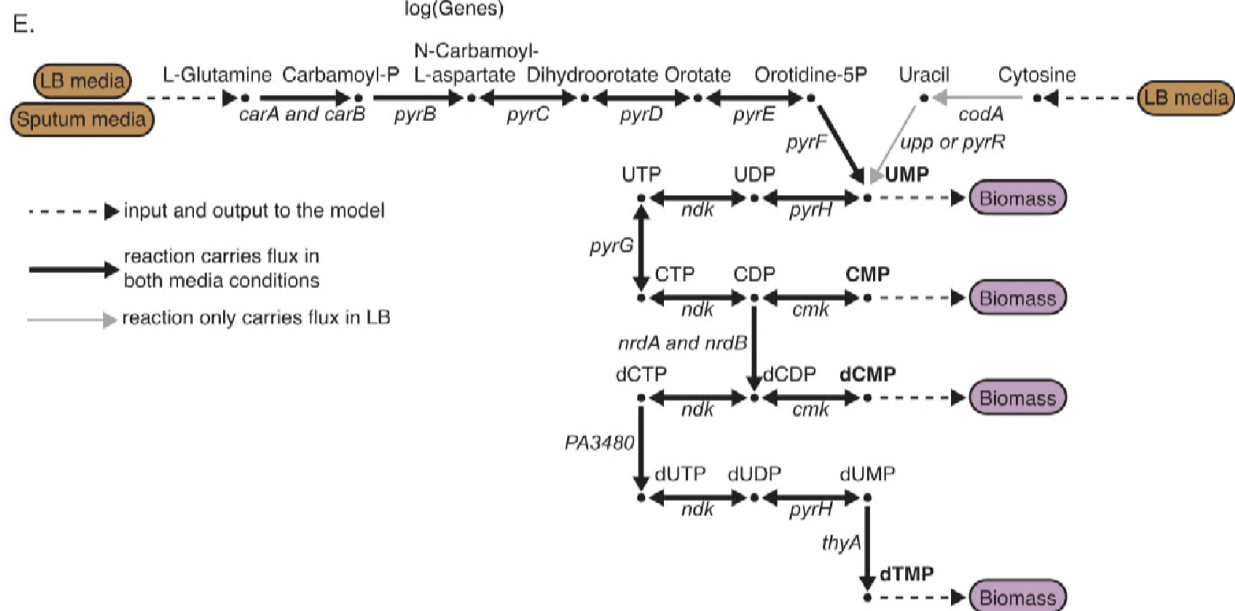

651



652 **Figure 2. Contextualization of gene essentiality datasets using genome-scale**  
653 **metabolic network reconstructions.**

654 (A). Comparison of model essentiality predictions to *in vitro* essentiality screens. *In silico*  
655 gene knockouts were performed for both PA14 and PA01 genome-scale metabolic network  
656 reconstructions to predict essential genes. Model-predicted essential genes were compared  
657 to the candidate essential genes for each *in vitro* screen. The bars show the result of this  
658 comparison, with orange indicating the number of genes for which both the model and  
659 experimental screen identified the gene as nonessential (match: both nonessential), red  
660 indicating the number of genes for which the model identified the gene as nonessential  
661 whereas the screen identified the gene as essential (mismatch: model-nonessential, screen-  
662 essential), green indicating the number of genes for which both the model and  
663 experimental screen identified the gene as essential (match: essential), and blue indicating  
664 the number of genes for which the model identified the gene as essential whereas the  
665 screen identified the gene as nonessential (mismatch: model-essential, screen-  
666 nonessential).

667 (B). Functional subsystems for PA14 consensus essential and nonessential genes that were  
668 also correctly predicted to be essential or nonessential in the PA14 GENRE. Consensus  
669 essential and nonessential genes were identified for PA14 by comparing all three LB  
670 screens and determining genes essential or nonessential in all three screens.

671 (C and D). Metabolic pathways demonstrating essentiality for the consensus essential  
672 genes *adk* and *glmS*, respectively. Dashed lines represent inputs and outputs of the  
673 pathway, or, as in D, multiple steps. Brown boxes indicate media inputs, while purple boxes  
674 indicate biomass outputs. Metabolites are labeled beside the nodes, with bold metabolites  
675 indicating biomass components. Genes associated with the specific reaction are indicated.

676 (E). Flux activity in pyrimidine metabolism under both sputum and LB media conditions.  
677 Consensus LB essential genes were compared to consensus sputum essential genes for  
678 PA01. The PA01 GENRE was used to explain differences in essentiality between the two  
679 media-types. Black lines indicate that the reaction is capable of carrying flux under both  
680 sputum and LB conditions, while the gray lines indicate that the reaction does not carry  
681 flux in sputum conditions but does in LB conditions. Brown boxes are media inputs, purple  
682 boxes are biomass outputs. Metabolites are labeled above the nodes, with bold metabolites  
683 indicating biomass components. Many of these metabolites are involved in many reactions  
684 beyond pyrimidine metabolism. Gene-protein-reaction relationships are indicated in italics  
685 beside each reaction edge.

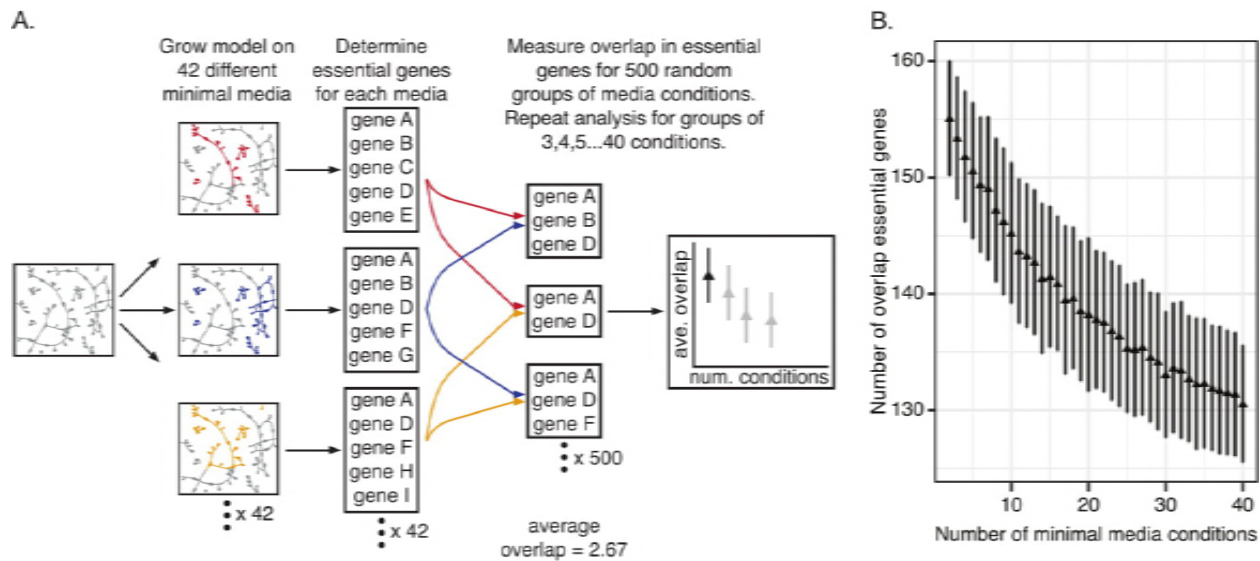

686  
687 **Figure 3. Computational assessment of the impact of number of minimal media**  
688 **conditions considered on condition-independent essentiality.**  
689 (A). Pipeline for computational assessment of the impact of minimal media composition on  
690 condition-independent essentiality. The base PA14 model is grown on 42 different minimal  
691 media. For each minimal media condition, the *in silico* essential genes are identified,  
692 resulting in 42 essential gene lists. Initially, pairwise comparisons are made between  
693 minimal media essential gene lists to identify the shared essential genes. Specifically, the  
694 essential gene lists from two randomly selected minimal media conditions are compared to  
695 determine the overlap between the two gene lists. This random selection of two minimal  
696 media conditions to compare is repeated 500 times. The average number of overlap genes  
697 for all 500 comparisons is calculated as well as the standard deviation. Ultimately, this  
698 random selection of groups of minimal media conditions to compare is repeated for groups  
699 of three minimal media conditions, groups of four, and so on, up to groups of 40 minimal  
700 media conditions.  
701 (B). Impact of minimal media differences on the identification of condition-independent  
702 essential genes. Each data point represents the mean from 500 comparisons. Error bars  
703 indicate standard deviation.

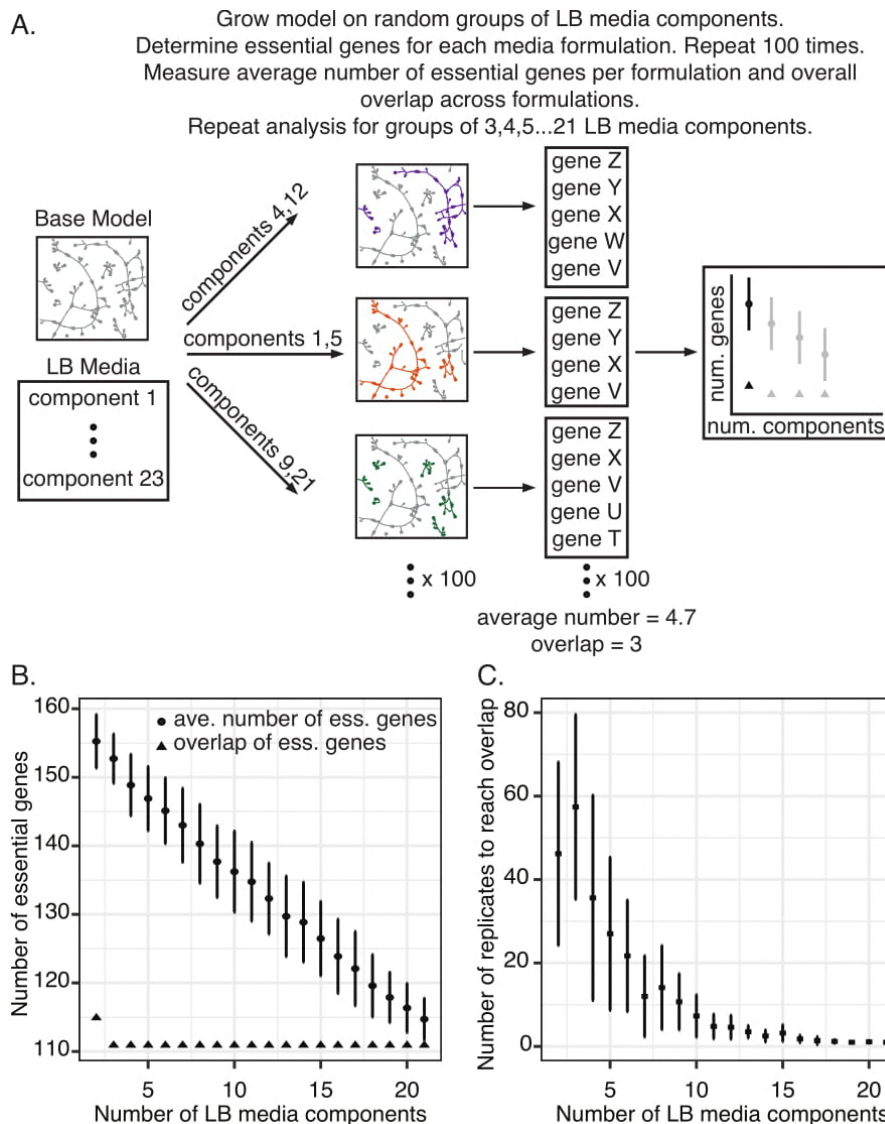

704  
 705 **Figure 4. Computational assessment of the impact of LB media composition on**  
 706 **condition-independent essentiality.**

707 (A). Pipeline for computational assessment of the impact of LB media formulation on  
 708 condition-independent essentiality. The PA14 model is grown on different media  
 709 formulations consisting of random groups of LB components. For instance, two random LB  
 710 components are selected out of a pool of 23 LB components. The model is grown on these  
 711 randomly selected pairs and the essential genes for growth on this media formulation are  
 712 identified. This analysis is repeated 100 times for 100 pairs of LB media components. The  
 713 average number of essential genes for growth on these random pairs across 100 different  
 714 formulations is calculated as well as the standard deviation. Additionally, the essential  
 715 genes common to all 100 different formulations is determined. Ultimately, this random  
 716 selection of groups of LB media components to support growth of the model and essential  
 717 gene identification is repeated for groups of three LB components, groups of four, and so  
 718 on, to groups of 21 LB media components.

719 (B) Impact of LB media formulation on the identification of condition-independent  
 720 essential genes. Circles represent the average number of essential genes identified in

721 different LB media formulations across 100 comparisons. Triangles represent the shared  
722 essential genes (i.e., the overlap) across all 100 comparisons. Error bars indicate standard  
723 deviation.

724 (C) Number of replicates needed to converge on shared essential genes in different LB  
725 formulations. The pipeline outlined in Panel A was repeated 10 independent times, with  
726 100 replicates per set size. For each iteration, the number of replicates needed to recapture  
727 the 111 overlapping genes was calculated. Each data point represents the average number  
728 of replicates from the 10 runs. Error bars indicate standard deviation.

729 **Tables**

| Screen             | Strain | Media                   | Number of Essential Genes | Publication           |
|--------------------|--------|-------------------------|---------------------------|-----------------------|
| PAO1.LB.913        | PAO1   | LB                      | 913                       | Jacobs et al., 2003   |
| PAO1.LB.201        | PAO1   | LB                      | 201                       | Lee et al., 2015      |
| PAO1.LB.335        | PAO1   | LB                      | 335                       | Turner et al., 2015   |
| PAO1.Sputum.224    | PAO1   | Sputum                  | 224                       | Lee et al., 2015      |
| PAO1.Sputum.405    | PAO1   | Sputum                  | 405                       | Turner et al., 2015   |
| PAO1.Pyruvate.179  | PAO1   | Pyruvate minimal media  | 179                       | Lee et al., 2015      |
| PAO1.Succinate.640 | PAO1   | Succinate minimal media | 640                       | Turner et al., 2015   |
| PA14.LB.1544       | PA14   | LB                      | 1544                      | Liberati et al., 2006 |
| PA14.LB.634        | PA14   | LB                      | 634                       | Skurnik et al., 2013  |
| PA14.Sputum.510    | PA14   | Sputum                  | 510                       | Turner et al., 2015   |

730  
731

**Table 1. Characteristics of the *in vitro* transposon mutagenesis screens.**

| PAO1 Locus Tag | Name         | Function                                                                       | Subsystem              |
|----------------|--------------|--------------------------------------------------------------------------------|------------------------|
| PA0265         | <i>davD</i>  | Glutaric semialdehyde dehydrogenase                                            | Carbohydrate           |
| PA0546         | <i>metK</i>  | Methionine adenosyltransferase                                                 | Amino Acid             |
| PA0581         | <i>ygiH</i>  | Glycerol-3-phosphate acyltransferase                                           | Lipid                  |
| PA1758         | <i>pabB</i>  | Para-aminobenzoate synthase component I                                        | Cofactors and Vitamins |
| PA1806         | <i>fabI</i>  | NADH-dependent enoyl-ACP reductase                                             | Lipid                  |
| PA1959         | <i>bacA</i>  | Bacitracin resistance protein                                                  | Glycan                 |
| PA2165         | <i>glgA</i>  | Probable glycogen synthase                                                     | Carbohydrate           |
| PA2964         | <i>pabC</i>  | 4-Amino-4-deoxychorismate lyase                                                | Cofactors and Vitamins |
| PA2969         | <i>plsX</i>  | Fatty acid biosynthesis protein PlsX                                           | Lipid                  |
| PA3164         |              | Frameshift 3-phosphoshikimate-carboxyvinyltransferase prephenate dehydrogenase | Amino Acid             |
| PA3296         | <i>phoA</i>  | Alkaline phosphatase                                                           | Cofactors and Vitamins |
| PA3333         | <i>fabH2</i> | 3-Oxoacyl-[acyl-carrier-protein] synthase III                                  | Lipid                  |
| PA3633         | <i>ygbP</i>  | 4-Diphosphocytidyl-2-C-methylerythritol synthase                               | Lipid                  |
| PA3659         | <i>dapC</i>  | Succinyldiaminopimelate transaminase                                           | Amino Acid             |
| PA3686         | <i>adk</i>   | Adenylate kinase                                                               | Nucleotide             |
| PA4050         | <i>pgpA</i>  | Phosphatidylglycerophosphatase A                                               | Lipid                  |
| PA4693         | <i>pssA</i>  | Phosphatidylserine synthase                                                    | Lipid                  |
| PA4770         | <i>lldP</i>  | L-lactate permease                                                             | Transport              |
| PA5322         | <i>algC</i>  | Phosphomannomutase AlgC                                                        | Carbohydrate           |
| PA5357         | <i>ubiC</i>  | Chorismate pyruvate lyase                                                      | Cofactors and Vitamins |

732  
733  
734

**Table 2. Discrepancies between model predicted essential genes and *in vitro* identified consensus nonessential genes for PAO1.**

## 735 References

- 736 1. Umland TC, Schultz LW, MacDonald U, Beanan JM, Olson R, Russo TA. In vivo-validated  
737 essential genes identified in *Acinetobacter baumannii* by using human ascites overlap  
738 poorly with essential genes detected on laboratory media. *MBio*. 2012;3.  
739 doi:10.1128/mBio.00113-12
- 740 2. Le Breton Y, Belew AT, Valdes KM, Islam E, Curry P, Tettelin H, et al. Essential Genes in  
741 the Core Genome of the Human Pathogen *Streptococcus pyogenes*. *Sci Rep*. 2015;5:  
742 9838.
- 743 3. Gallagher LA, Shendure J, Manoil C. Genome-Scale Identification of Resistance  
744 Functions in *Pseudomonas aeruginosa* Using Tn-seq. 2011; doi:10.1128/mBio.00315-  
745 10.Editor
- 746 4. Moule MG, Hemsley CM, Seet Q. Genome-Wide Saturation Mutagenesis of *Burkholderia*  
747 *pseudomallei*. *MBio*. 2014;5: 1–9.
- 748 5. van Opijnen T, Camilli A. A fine scale phenotype–genotype virulence map of a bacterial  
749 pathogen. *Genome Res*. 2012;22: 2541–2551.
- 750 6. Turner KH, Everett J, Trivedi U, Rumbaugh KP, Whiteley M. Requirements for  
751 *Pseudomonas aeruginosa* Acute Burn and Chronic Surgical Wound Infection. *PLoS*  
752 *Genet*. 2014;10. doi:10.1371/journal.pgen.1004518
- 753 7. Ibberson CB, Stacy A, Fleming D, Dees JL, Rumbaugh K, Gilmore MS, et al. Co-infecting  
754 microorganisms dramatically alter pathogen gene essentiality during polymicrobial  
755 infection. *Nature Microbiology*. Nature Publishing Group; 2017;2: 1–6.
- 756 8. Chao MC, Abel S, Davis BM, Waldor MK. The design and analysis of transposon  
757 insertion sequencing experiments. *Nat Rev Microbiol*. Nature Publishing Group;  
758 2016;14: 119–128.
- 759 9. Grenov AI, Gerdes SY. Modeling competitive outgrowth of mutant populations: why do  
760 essentiality screens yield divergent results? *Methods Mol Biol*. 2008;416: 361–367.
- 761 10. Burger BT, Imam S, Scarborough MJ, Noguera DR, Donohue TJ. Combining genome-  
762 scale experimental and computational methods to identify essential genes in  
763 *Rhodobacter sphaeroides*. *mSystems*. 2017;2: 1–18.
- 764 11. Broddrick JT, Rubin BE, Welkie DG, Du N, Mih N, Diamond S, et al. Unique attributes of  
765 cyanobacterial metabolism revealed by improved genome-scale metabolic modeling  
766 and essential gene analysis. *Proceedings of the National Academy of Sciences*.  
767 2016;113: E8344–E8353.
- 768 12. Chavali AK, D’Auria KM, Hewlett EL, Pearson RD, Papin J a. A metabolic network  
769 approach for the identification and prioritization of antimicrobial drug targets. *Trends*

- 770 Microbiol. Elsevier Ltd; 2012;20: 113–123.
- 771 13. Zampieri M, Enke T, Chubukov V, Ricci V, Piddock L, Sauer U. Metabolic constraints on  
772 the evolution of antibiotic resistance. 2017; 1–14.
- 773 14. Bosi E, Monk JM, Aziz RK, Fondi M, Nizet V, Palsson BØ. Comparative genome-scale  
774 modelling of *Staphylococcus aureus* strains identifies strain-specific metabolic  
775 capabilities linked to pathogenicity. Proceedings of the National Academy of Sciences.  
776 2016; 201523199.
- 777 15. Jacobs M a., Alwood A, Thaipisuttikul I, Spencer D, Haugen E, Ernst S, et al.  
778 Comprehensive transposon mutant library of *Pseudomonas aeruginosa*. Proc Natl  
779 Acad Sci U S A. 2003;100: 14339–14344.
- 780 16. Liberati NT, Urbach JM, Miyata S, Lee DG, Drenkard E, Wu G, et al. An ordered,  
781 nonredundant library of *Pseudomonas aeruginosa* strain PA14 transposon insertion  
782 mutants. Proc Natl Acad Sci U S A. 2006;103: 2833–2838.
- 783 17. Skurnik D, Roux D, Aschard H, Cattoir V, Yoder-Himes D, Lory S, et al. A Comprehensive  
784 Analysis of In Vitro and In Vivo Genetic Fitness of *Pseudomonas aeruginosa* Using  
785 High-Throughput Sequencing of Transposon Libraries. PLoS Pathog. 2013;9.  
786 doi:10.1371/journal.ppat.1003582
- 787 18. Turner KH, Wessel AK, Palmer GC, Murray JL, Whiteley M. Essential genome of  
788 *Pseudomonas aeruginosa* in cystic fibrosis sputum. Proceedings of the National  
789 Academy of Sciences. 2015; 201419677.
- 790 19. Lee S a., Gallagher L a., Thongdee M, Staudinger BJ, Lippman S, Singh PK, et al. General  
791 and condition-specific essential functions of *Pseudomonas aeruginosa*. Proceedings of  
792 the National Academy of Sciences. 2015; 201422186.
- 793 20. Powell JE, Leonard SP, Kwong WK, Engel P, Moran NA. Genome-wide screen identifies  
794 host colonization determinants in a bacterial gut symbiont. Proc Natl Acad Sci U S A.  
795 2016;113: 13887–13892.
- 796 21. Juhas M, Eberl L, Glass JI. Essence of life: essential genes of minimal genomes. Trends  
797 Cell Biol. 2011;21: 562–568.
- 798 22. Juhas M. *Pseudomonas aeruginosa* essentials: An update on investigation of essential  
799 genes. Microbiology. 2015;161: 2053–2060.
- 800 23. Bartell JA, Blazier AS, Yen P, Thøgersen JC, Jelsbak L, Goldberg JB, et al. Reconstruction  
801 of the metabolic network of *Pseudomonas aeruginosa* to interrogate virulence factor  
802 synthesis. Nat Commun. 2017;8. doi:10.1038/ncomms14631
- 803 24. Monk JM, Lloyd CJ, Brunk E, Mih N, Sastry A, King Z, et al. iML1515, a knowledgebase  
804 that computes *Escherichia coli* traits\_supplement. Nat Biotechnol. 2017;35: 904–908.



- 805 25. Ghosh S, Baloni P, Mukherjee S, Anand P, Chandra N. A multi-level multi-scale  
806 approach to study essential genes in *Mycobacterium tuberculosis*. *BMC Syst Biol*.  
807 2013;7: 132.
- 808 26. Zhu L, Lin J, Ma J, Cronan JE, Wang H. Triclosan resistance of *Pseudomonas aeruginosa*  
809 PAO1 is due to FabV, a triclosan-resistant enoyl-acyl carrier protein reductase.  
810 *Antimicrob Agents Chemother*. 2010;54: 689–698.
- 811 27. Lu Y-J, Zhang Y-M, Grimes KD, Qi J, Lee RE, Rock CO. Acyl-phosphates initiate  
812 membrane phospholipid synthesis in Gram-positive pathogens. *Mol Cell*. 2006;23:  
813 765–772.
- 814 28. Kondakova T, D’Heygère F, Feuilloley MJ, Orange N, Heipieper HJ, Duclairoir P, C.  
815 Glycerophospholipid synthesis and functions in *Pseudomonas*. *Chem Phys Lipids*.  
816 2015;190: 27–42.
- 817 29. Wilson WA, Roach PJ, Montero M, Baroja-Fernández E, Muñoz FJ, Eydallin G, et al.  
818 Regulation of glycogen metabolism in yeast and bacteria. *FEMS Microbiol Rev*.  
819 2010;34: 952–985.
- 820 30. Megchelenbrink W, Huynen M, Marchiori E. optGpSampler: an improved tool for  
821 uniformly sampling the solution-space of genome-scale metabolic networks. *PLoS One*.  
822 2014;9: e86587.
- 823 31. Sridhar S, Steele-Mortimer O. Inherent Variability of Growth Media Impacts the Ability  
824 of *Salmonella Typhimurium* to Interact with Host Cells. *PLoS One*. 2016;11: e0157043.
- 825 32. Sezonov G, Joseleau-Petit D, D’Ari R. *Escherichia coli* physiology in Luria-Bertani broth.  
826 *J Bacteriol*. 2007;189: 8746–8749.
- 827 33. Kobayashi K, Ehrlich SD, Albertini A, Amati G, Andersen KK, Arnaud M, et al. Essential  
828 *Bacillus subtilis* genes. *Proceedings of the National Academy of Sciences*. 2003;100:  
829 4678–4683.
- 830 34. Sasseti CM, Boyd DH, Rubin EJ. Comprehensive identification of conditionally  
831 essential genes in mycobacteria. *Proceedings of the National Academy of Sciences*.  
832 2001;98: 12712–12717.
- 833 35. Hutchison C a. III, Peterson SN, Gill SR, Cline RT, White O, Fraser CM, et al. Global  
834 Transposon Mutagenesis and a Minimal *Mycoplasma* Genome. *Science*. 1999;286:  
835 2165–2169.
- 836 36. Van Opijnen T, Camilli A. Transposon insertion sequencing: A new tool for systems-  
837 level analysis of microorganisms. *Nat Rev Microbiol*. Nature Publishing Group;  
838 2013;11: 435–442.
- 839 37. Fu Y, Waldor MK, Mekalanos JJ. Tn-seq analysis of *vibrio cholerae* intestinal

- 840 colonization reveals a role for T6SS-mediated antibacterial activity in the host. *Cell*  
841 *Host Microbe*. Elsevier Inc.; 2013;14: 652–663.
- 842 38. Osterman AL, Gerdes SY. Comparative approach to analysis of gene essentiality.  
843 *Methods Mol Biol*. 2008;416: 459–466.
- 844 39. Nichols RJ, Sen S, Choo YJ, Beltrao P, Zietek M, Chaba R, et al. Phenotypic landscape of a  
845 bacterial cell. *Cell*. 2011;144: 143–156.
- 846 40. Wang Z, Danziger SA, Heavner BD, Ma S, Smith JJ, Li S, et al. Combining inferred  
847 regulatory and reconstructed metabolic networks enhances phenotype prediction in  
848 yeast. *PLoS Comput Biol*. 2017;13: e1005489.
- 849 41. Conway JR, Lex A, Gehlenborg N. UpSetR: an R package for the visualization of  
850 intersecting sets and their properties. *Bioinformatics*. 2017;33: 2938–2940.
- 851 42. Schellenberger J, Que R, Fleming RMT, Thiele I, Orth JD, Feist AM, et al. Quantitative  
852 prediction of cellular metabolism with constraint-based models: the COBRA Toolbox  
853 v2.0. *Nat Protoc*. 2011;6: 1290–1307.
- 854 43. Kanehisa M, Goto S, Sato Y, Furumichi M, Tanabe M. KEGG for integration and  
855 interpretation of large-scale molecular data sets. *Nucleic Acids Res*. 2012;40: D109–14.
- 856 44. Langmead B, Salzberg SL. Fast gapped-read alignment with Bowtie 2. *Nat Methods*.  
857 2012;9: 357–359.
- 858 45. Li H, Handsaker B, Wysoker A, Fennell T, Ruan J, Homer N, et al. The Sequence  
859 Alignment/Map format and SAMtools. *Bioinformatics*. 2009;25: 2078–2079.

## 860 **Supplementary Information**

861

862 Dataset\_S1.xls - PA01 candidate essential genes for *in vitro* screens

863 Candidate essential genes lists for each PA01 transposon mutagenesis screen.

864 Candidate essential genes are marked with a '1', while non-essential genes are  
865 marked with a '0'.

866

867 Dataset\_S2.xls - PA14 candidate essential genes for *in vitro* screens

868 Candidate essential genes lists for each PA14 transposon mutagenesis screen.

869 Candidate essential genes are marked with a '1', while non-essential genes are  
870 marked with a '0'.

871

872 Dataset\_S3.xls - PA01 model predicted essential genes for *in silico* screens

873 Model predicted essential genes lists for PA01 growth simulated on LB media,  
874 Sputum media, Pyruvate minimal media, and Succinate minimal media. Model  
875 predicted essential genes are marked with a '1', while non-essential genes are  
876 marked with a '0'.

877

878 Dataset\_S4.xls - PA14 model predicted essential genes for *in silico* screens

879 Model predicted essential genes lists for PA14 growth simulated on LB media and  
880 Sputum media. Model predicted essential genes are marked with a '1', while non-  
881 essential genes are marked with a '0'.

882

883 Dataset\_S5.xls - PA01 consensus metabolic essential/non-essential genes

884 Lists of consensus metabolic essential and non-essential genes for PA01 on LB  
885 media and Sputum media.

886

887 Dataset\_S6.xls - PA14 consensus metabolic essential/non-essential genes

888 Lists of consensus metabolic essential and non-essential genes for PA14 on LB  
889 media.

890

891 Dataset\_S7.xls - Biomass precursors for PA01 model predicted consensus essential genes

892 List of biomass precursors that cannot be synthesized when PA01 model predicted  
893 consensus essential genes are removed from the model.

894

895 Dataset\_S8.xls - Biomass precursors for PA14 model predicted consensus essential genes

896 List of biomass precursors that cannot be synthesized when PA14 model predicted  
897 consensus essential genes are removed from the model.

898

899 Dataset\_S9.xls - Proposed model changes

900 Table of proposed model changes based on discrepancies between model  
901 predictions and consensus metabolic non-essential genes for PA01 on LB.

902

903 Dataset\_S10.xls - PA01 model predicted essential genes for *in silico* screens for the updated  
904 PA01 model

905 Model predicted essential genes lists for PAO1 growth simulated on LB media and  
906 Sputum media. Model predicted essential genes are marked with a '1', while non-  
907 essential genes are marked with a '0'.  
908  
909 Dataset\_S11.xls - PA14 model predicted essential genes for *in silico* screens for the updated  
910 PA14 model  
911 Model predicted essential genes lists for PA14 growth simulated on LB media.  
912 Model predicted essential genes are marked with a '1', while non-essential genes are  
913 marked with a '0'.  
914  
915 Figure S1. Comparison of candidate essential genes from PAO1 LB transposon mutagenesis  
916 screens reveals variability across screens.  
917  
918 Figure S2. Comparison of candidate essential genes from LB transposon mutagenesis  
919 screens reveals variability across screens.  
920  
921 Figure S3. Distribution of PAO1 consensus essential and nonessential genes across model  
922 subsystems  
923  
924 Table S1. Detailed description of *in vitro* transposon mutagenesis screens.  
925  
926 Table S2. Percent accuracy between model predictions of essentiality and *in vitro* identified  
927 essential genes.  
928  
929 Table S3. Consensus metabolic essential and non-essential genes for PAO1 and PA14 media  
930 conditions with more than two screens.

931

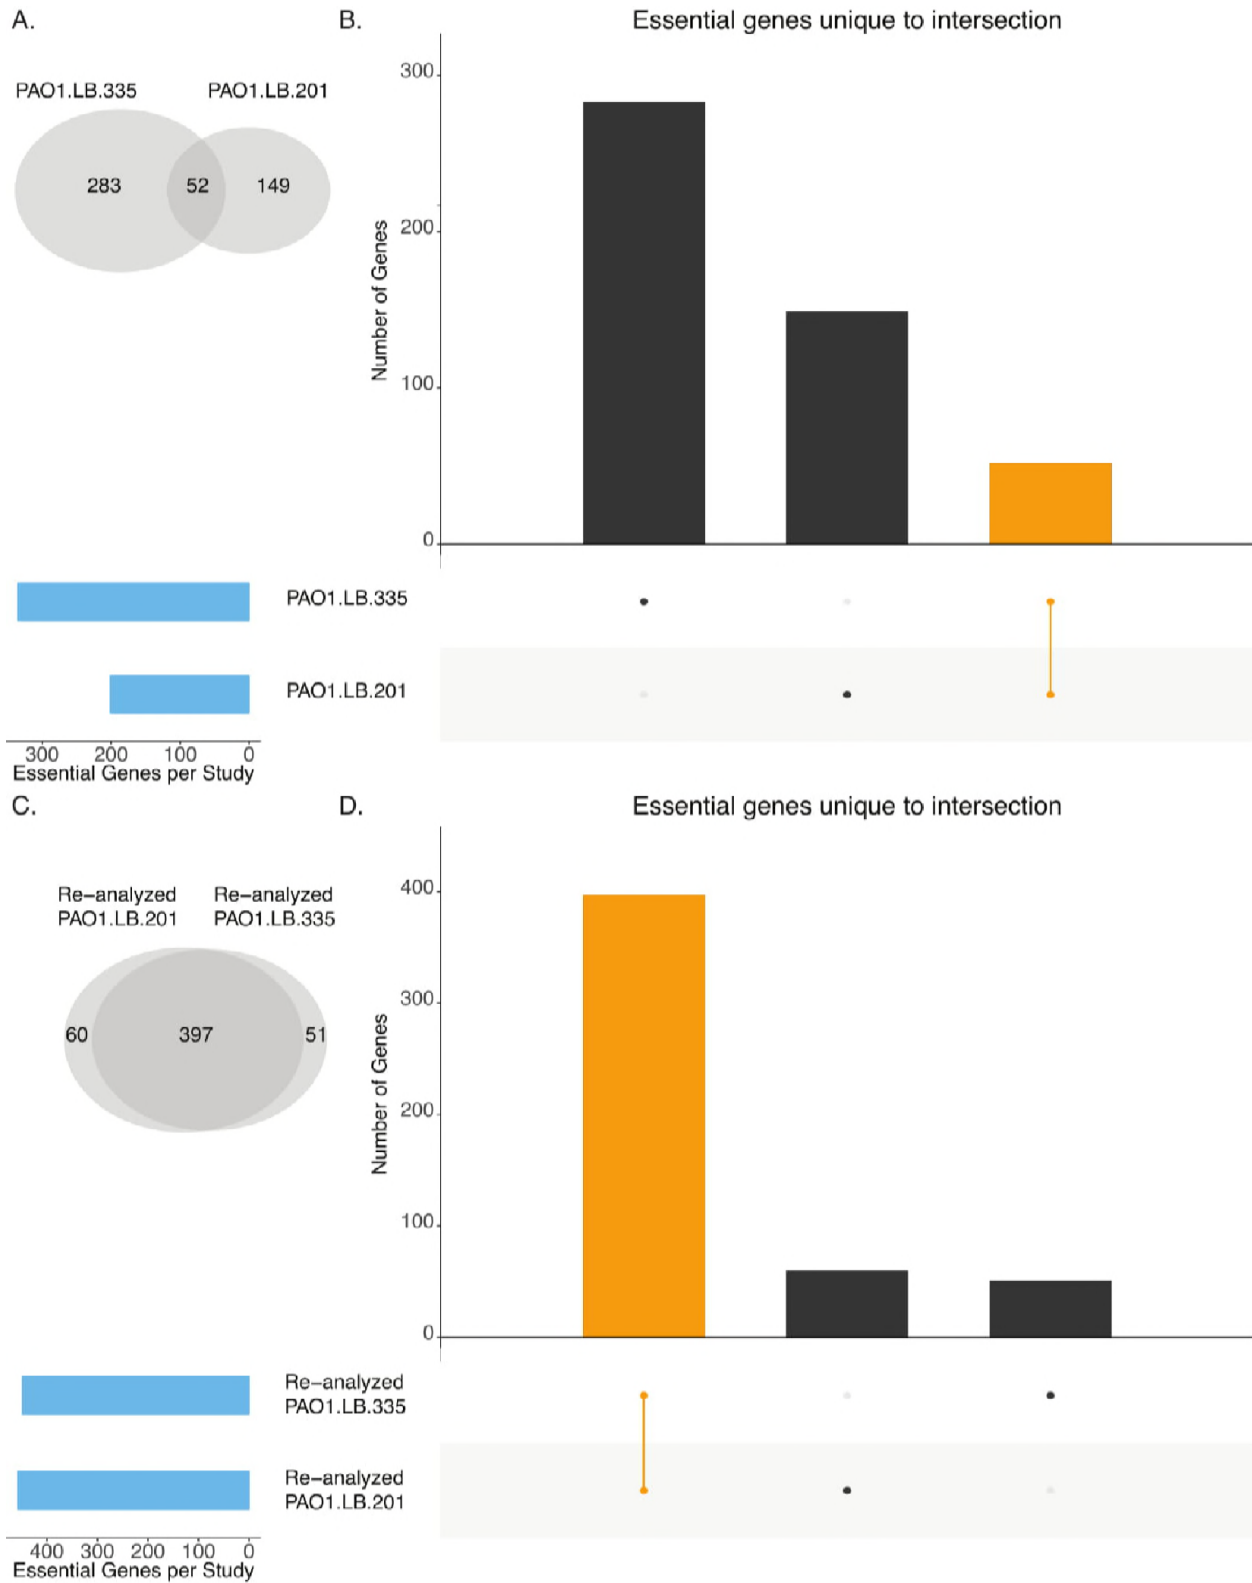

932

933

934

**Figure S1. Comparison of candidate essential genes from PAO1 LB transposon mutagenesis screens reveals variability across screens.**

935 (A and C). Venn diagrams of original (Panel A) and re-analyzed (Panel C) candidate  
936 essential gene lists from PAO1 transposon mutagenesis screens performed on LB .  
937 (B and D). Overlap analysis of original (Panel B) and re-analyzed (Panel D) candidate  
938 essential gene lists for PAO1 transposon mutagenesis screens performed on LB. Blue bars  
939 indicate the total number of candidate essential genes identified in each screen. Black bars  
940 indicate the number of candidate essential genes unique to the intersection given by the  
941 filled-in dots. The orange bar indicates the overlap of both screens.

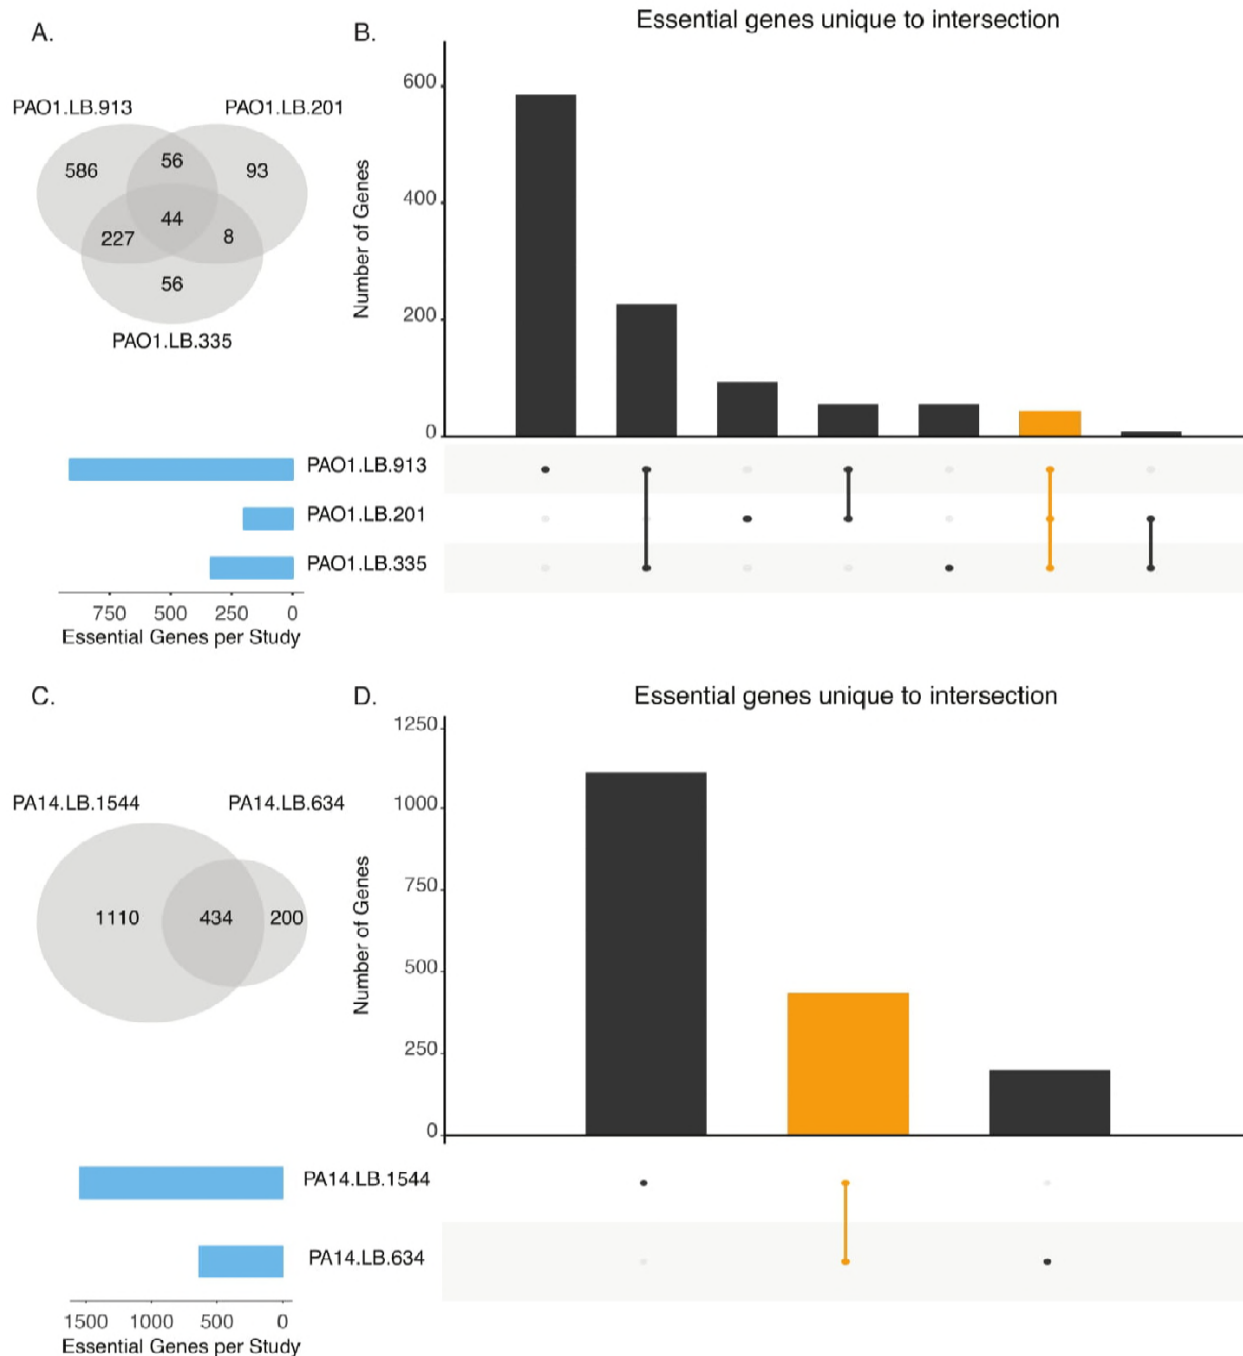

942  
 943 **Figure S2. Comparison of candidate essential genes from LB transposon mutagenesis**  
 944 **screens reveals variability across screens.**

945 (A and C). Venn diagram of candidate essential genes lists for transposon mutagenesis  
 946 screens performed on LB for PAO1 and PA14, respectively.

947 (B and D). Overlap analysis of candidate essential gene lists for transposon mutagenesis  
 948 screens performed on LB for PAO1 and PA14, respectively. Blue bars indicate the total  
 949 number of candidate essential genes identified in each screen. Black bars indicate the  
 950 number of candidate essential genes unique to the intersection given by the filled-in dots.  
 951 The orange bar indicates the overlap for all screens for either PAO1 (Panel B) or PA14

952 (Panel D). The black and orange bars correspond to the intersections identified in the venn  
953 diagrams in panels A and C.



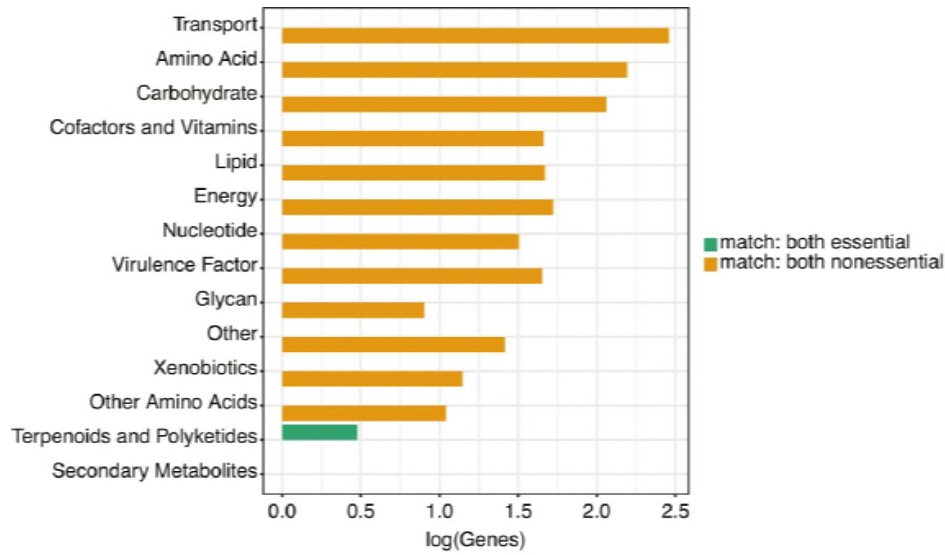

954

955 **Figure S3. Distribution of PAO1 consensus essential and nonessential genes across**  
956 **model subsystems**

957 Functional subsystems for PAO1 consensus essential and nonessential genes that were also  
958 identified to be essential or nonessential in the PAO1 genome-scale metabolic network  
959 model. Consensus essential and nonessential genes were identified for PAO1 by comparing  
960 all three LB screens and identifying those genes which were either essential or  
961 nonessential in all three screens.

| Screen             | Strain | Media                   | Number of Essential Genes | Publication of analyzed datasets | Initial publication of dataset | Publication of initial insertion library | Experimental overview to generate initial insertion library            | Analysis overview                                                               |
|--------------------|--------|-------------------------|---------------------------|----------------------------------|--------------------------------|------------------------------------------|------------------------------------------------------------------------|---------------------------------------------------------------------------------|
| PAO1.LB.913        | PAO1   | LB                      | 913                       | Jacobs et al., 2003              | Jacobs et al., 2003            | Jacobs et al., 2003                      | Random transposon insertion mutagenesis with ISphoA and ISlacZ         | Manual tally of recovered genes                                                 |
| PAO1.LB.201        | PAO1   | LB                      | 201                       | Lee et al., 2015                 | Lee et al., 2015               | Lee et al., 2015                         | Tn-seq circle method with Tn5-based transposon T8                      | Number of transposon insertions per gene compared to a normal distribution      |
| PAO1.LB.335        | PAO1   | LB                      | 335                       | Turner et al., 2015              | Gallagher et al., 2011         | Gallagher et al., 2011                   | Tn-seq circle method with Tn5-based transposon T8                      | Number of transposon insertions per gene compared to Monte Carlo simulated data |
| PAO1.Sputum.224    | PAO1   | Sputum                  | 224                       | Lee et al., 2015                 | Lee et al., 2015               | Lee et al., 2015                         | Tn-seq circle method with Tn5-based transposon T8                      | Number of transposon insertions per gene compared to a normal distribution      |
| PAO1.Sputum.405    | PAO1   | Sputum                  | 405                       | Turner et al., 2015              | Turner et al., 2015            | Gallagher et al., 2011                   | Tn-seq circle method with Tn5-based transposon T8                      | Number of transposon insertions per gene compared to Monte Carlo simulated data |
| PAO1.Pyruvate.179  | PAO1   | Pyruvate minimal media  | 179                       | Lee et al., 2015                 | Lee et al., 2015               | Lee et al., 2015                         | Tn-seq circle method with Tn5-based transposon T8                      | Number of transposon insertions per gene compared to a normal distribution      |
| PAO1.Succinate.640 | PAO1   | Succinate minimal media | 640                       | Turner et al., 2015              | Turner et al., 2014            | Gallagher et al., 2011                   | PCR-based Tn-seq method with Tn5-based transposon T8                   | Number of transposon insertions per gene compared to Monte Carlo simulated data |
| PA14.LB.1544       | PA14   | LB                      | 1544                      | Liberati et al., 2006            | Liberati et al., 2006          | Liberati et al., 2006                    | Random transposon insertion mutagenesis with mariner family transposon | Manual tally of recovered genes                                                 |
| PA14.LB.634        | PA14   | LB                      | 634                       | Skurnik et al., 2013             | Skurnik et al., 2013           | Skurnik et al., 2013                     | INSeq method with mariner family transposon                            | Fold change between reads per kilobase per million reads                        |
| PA14.Sputum.510    | PA14   | Sputum                  | 510                       | Turner et al., 2015              | Turner et al., 2015            | Turner et al., 2015                      | PCR-based Tn-seq method with Tn5-based transposon T8                   | Number of transposon insertions per gene compared to Monte Carlo simulated data |

962  
963

**Table S1. Detailed description of *in vitro* transposon mutagenesis screens.**

| Screen             | % Accuracy |
|--------------------|------------|
| PAO1.LB.913        | 87.46      |
| PAO1.LB.201        | 84.76      |
| PAO1.LB.335        | 89.29      |
| PAO1.Sputum.224    | 84.32      |
| PAO1.Sputum.405    | 87.63      |
| PAO1.Pyruvate.179  | 86.07      |
| PAO1.Succinate.640 | 83.28      |
| PA14.LB.1544       | 79.95      |
| PA14.LB.634        | 84.63      |
| PA14.Sputum.510    | 87.81      |

964  
965 **Table S2. Percent accuracy between model predictions of essentiality and *in vitro***  
966 **identified essential genes.**

| Strain | Media  | Consensus Essential Genes | Consensus Non-essential Genes | Original Model Predicted Consensus Essential Genes | Original Model Predicted Consensus Non-essential Genes | Original Model Accuracy (%) | Updated Model Predicted Consensus Essential Genes | Updated Model Predicted Consensus Non-essential Genes | Updated Model Accuracy (%) |
|--------|--------|---------------------------|-------------------------------|----------------------------------------------------|--------------------------------------------------------|-----------------------------|---------------------------------------------------|-------------------------------------------------------|----------------------------|
| PA01   | LB     | 15                        | 863                           | 7                                                  | 843                                                    | 99.91                       | 7                                                 | 848                                                   | 97.38                      |
| PA01   | Sputum | 67                        | 803                           | 24                                                 | 814                                                    | 92.58                       | 24                                                | 818                                                   | 92.39                      |
| PA14   | LB     | 113                       | 888                           | 45                                                 | 777                                                    | 98.83                       | 45                                                | 781                                                   | 98.47                      |

967  
968 **Table S3. Consensus metabolic essential and non-essential genes for PA01 and PA14**  
969 **media conditions with more than two screens.**
